# Supplementary material for: The Emotional Movie Database (EMDB): An Expanded Toolkit for Emotion Research
Source: Research Square preprint supplement (doi:10.21203/rs.3.rs-6401734/v1), 2025-06-09
Supplement: Supplementary file 1 [file 190915185ea79b6d8e39683f.docx]

**Supplementary Material**

**Table S1** Descriptive Ratings for Each EMDB Film Clip by Emotional Category, Based on Lab-Based and Web-Based Assessments

This table presents descriptive data for each film clip in the expanded Emotional Movie Database (EMDB), organized by emotional category: Neutral, Social Exclusion, Unpleasant Landscapes, Extreme Sports, and Social Inclusion. For each clip, data from the lab-based and web-based assessments are reported (when available).

| Film clip Category | | Name |  | Lab-based data | | | | | |  |  | Web-based data | | | | |
| --- | --- | --- | --- | --- | --- | --- | --- | --- | --- | --- | --- | --- | --- | --- | --- | --- |
|  | Knew  % | Emotion 1  (%) | Emotions 2  (%) | Emotions 3  (%) | Eyes  (%) | Experienced  (%) |  | Knew  (%) | Emotion 1  (%) | Emotions 2 (%) | Emotions 3  (%) | Eyes  (%) | Experienced  (%) |
| **Neutral** | **6,002** | Big triangles  (*n* = 104) |  | - | - | - | - | - | - |  | 5.8 | Neutral  (90.2) | Surprise  (5.4) | Happiness/ Embarrassment  (1.8) | 2.9 | 10.6 |
| **6,003** | Highlighters |  | - | - | - | - | - | - |  | 0 | Neutral  (69.9) | Aversion/Anger (6.5) | Surprise  (5.7) | 1.9 | 36.5 |
| **6,004** | Squares |  | - | - | - | - | - | - |  | 1.0 | Neutral  (81.4) | Anger (4.2) | Sadness  (3.4) | 2.9 | 13.5 |
| **6,005** | Cups |  | - | - | - | - | - | - |  | 0 | Neutral  (77.4) | Happiness  (7.8) | Surprise  (3.5) | 4.8 | 31.7 |
| **6,006** | Painting |  | - | - | - | - | - | - |  | 1.0 | Neutral  (57.2) | Happiness  (15.2) | Longing  (8.7) | 1.0 | 67.3 |
| **6,007** | Labyrinths |  | - | - | - | - | - | - |  | 0 | Neutral  (62.5) | Happiness  (18.8) | Longing  (5.5) | 1.0 | 71.2 |
| **6,008** | Bouncing ball  (*n* = 111) |  | - | - | - | - | - | - |  | 3.6 | Neutral  (62.0) | Happiness  (10.2) | Surprise  (8.8) | 1.8 | 31.5 |
| **6,009** | Small triangles |  | - | - | - | - | - | - |  | 6.3 | Neutral  (82.0) | Happiness/Anger (4.1) | Aversion  (2.5) | 2.7 | 9.0 |
| **6,010** | Wood doll |  | - | - | - | - | - | - |  | 3.6 | Neutral  (82.5) | Surprise  (4.0) | Happiness  (3.2) | 2.7 | 20.7 |
| **6,011** | Gait |  | - | - | - | - | - | - |  | 4.5 | Neutral  (73.3) | Surprise  (8.4) | Aversion  (5.3) | 1.8 | 40.5 |
| **6,012** | Cutlery |  | - | - | - | - | - | - |  | 2.7 | Neutral  (77.0) | Happiness  (4.0) | Aversion/Anger (3.2) | 1.8 | 47.7 |
| **6,013** | Trapezoids |  | - | - | - | - | - | - |  | 5.4 | Neutral  (91.3) | Happiness  (3.5) | Anger (1.7) | 5.4 | 9.9 |
| **6,014** | Napkins |  | - | - | - | - | - | - |  | 2.7 | Neutral  (78.1) | Anger (5.5) | Aversion  (3.9) | 3.6 | 42.3 |
| Social Exclusion | **7,000** | American yearbook  (*n* = 228) |  | 0 | Anger (39.8) | Aversion  (18.6) | Sadness  (18.2) | 6.8 | 0.9 |  | 3.6 | Anger (34.4) | Aversion  (19.7) | Sadness  (14.3) | 8.1 | 4.5 |
| **7,001** | Bang Bang You're dead |  | 1.7 | Anger (36.9) | Aversion  (23.8) | Sadness  (16.6) | 18.8 | 0.9 |  | 6.3 | Anger (32.4) | Aversion  (23.3) | Sadness  (15.3) | 16.2 | 2.7 |
| **7,002** | Kidulthood |  | 1.7 | Anger (38.1) | Sadness  (27.0) | Aversion  (10.7) | 3.4 | 5.1 |  | 4.5 | Anger (32.7) | Sadness  (19.5) | Aversion  (16.7) | 5.4 | 7.2 |
| **7,003** | Klass |  | 1.7 | Anger (36.7) | Sadness  (26.7) | Aversion  (9.6) | 0 | 1.7 |  | 3.6 | Anger (31.5) | Sadness  (21.5) | Aversion  (17.2) | 6.3 | 4.5 |
| **7,004** | Little boy |  | 8.5 | Anger (32.2) | Sadness  (31.9) | Aversion  (8.8) | 0 | 2.6 |  | 3.6 | Anger/ Sadness  (27.4) | Aversion  (15.0) | Compassion  (10.6) | 5.4 | 2.7 |
| **7,005** | Social exclusion, source YouTube (*n* = 221) |  | 1.7 | Sadness  (34.9) | Anger (31.7) | Compassion  (12.5) | 1.7 | 16.2 |  | 0 | Anger  (32.2) | Sadness  (26.9) | Aversion  (11.4) | 2.9 | 17.3 |
| **7,006** | Bullying the guest |  | 7.7 | Anger (36.3) | Sadness  (27.5) | Aversion  (10.6) | 0 | 19.7 |  | 5.8 | Anger  (32.1) | Sadness  (22.5) | Aversion  (16.3) | 1.9 | 13.5 |
| **7,007** | Girl Fight (2011) |  | 5.1 | Anger (37.1) | Sadness  (21.1) | Aversion (16.7) | 0 | 5.1 |  | 1.0 | Anger  (35.2) | Aversion  (20.2) | Sadness (16.2) | 2.9 | 7.7 |
| **7,008** | Tormented |  | 7.7 | Anger (35.5) | Sadness  (25.4) | Aversion (12.0) | 4.3 | 7.7 |  | 4.8 | Anger (37.0) | Sadness  (18.5) | Aversion  (15.9) | 2.9 | 9.6 |
| **7,009** | Source: Unknown |  | 0.9 | Anger (35.0) | Sadness  (24.8) | Aversion  (11.5) | 1.7 | 1.7 |  | 1.0 | Anger (34.2) | Sadness  (24.2) | Aversion  (13.1) | 2.9 | 2.9 |
| Unpleasant Landscapes | **8,000** | Baraka (1992) 2160p 4k |  | 3.4 | Sadness  (34.2) | Anger (11.7) | Guilt (11.4) | 1.7 | 2.6 |  | - | - | - | - | - | - |
| **8,001** | Baraka (1992) 2160p 4k |  | 3.4 | Sadness  (35.6) | Compassion  (13.6) | Pity (9.8) | 1.7 | 1.7 |  | - | - | - | - | - | - |
| **8,002** | HUMAN Extended version VOL.1 |  | 1.7 | Sadness  (37.0) | Pity (13.0) | Solidarity (10.2) | 1.7 | 0 |  | - | - | - | - | - | - |
| 8,003 | How plastic destroying the environment and human health - Sky News |  | 1.7 | Sadness  (37.2) | Compassion  (12.6) | Pity (10.0) | 2.6 | 0 |  | - | - | - | - | - | - |
| **8,004** | How plastic destroying the environment and human health - Sky News |  | 0.9 | Sadness  (34.9) | Compassion  (15.5) | Solidarity (12.3) | 4.3 | 4.3 |  | - | - | - | - | - | - |
| **8,005** | HUMAN Extended version VOL.1 |  | 0.9 | Sadness  (37.1) | Compassion  (10.8) | Pity (10.0) | 1.7 | 0.9 |  | - | - | - | - | - | - |
| **8,006** | Baraka (1992) 2160p 4k |  | 0 | Sadness  (37.2) | Compassion  (14.1) | Pity (12.3) | 2.6 | 4.3 |  | - | - | - | - | - | - |
| **8,007** | Samsara (2011) |  | 0 | Sadness  (37.6) | Compassion  (15.6) | Solidarity (12.5) | 4.3 | 2.6 |  | - | - | - | - | - | - |
| **8,008** | Samsara (2011) |  | 0.9 | Sadness  (35.7) | Compassion  (13.9) | Solidarity (13.1) | 2.6 | 0.9 |  | - | - | - | - | - | - |
| **8,009** | Baraka (1992) 2160p 4k |  | 0 | Sadness  (36.0) | Compassion  (13.8) | Pity (12.9) | 3.4 | 1.7 |  | - | - | - | - | - | - |
| **Extreme Sports** | **9,000** | Dan Atherton Sends It Down the Hardline MTB Track |  | 6.0 | Fear (30.0) | Neutral (24.0) | Happiness (21.0) | 6.0 | 12.8 |  | - | - | - | - | - | - |
| **9,001** | GoPro: Carson Storch's GIANT 360 Drop at Red Bull Rampage 2016 |  | 7.7 | Fear (41.2) | Surprise (18.1) | Happiness (17.1) | 7.7 | 3.4 |  | - | - | - | - | - | - |
| **9,002** | Kenny Belaey's Balance |  | 2.6 | Fear (39.6) | Surprise (29.7) | Happiness (14.4) | 4.3 | 0.9 |  | - | - | - | - | - | - |
| **9,003** | GoPro Awards: Base Jump |  | 1.7 | Happiness (29.4) | Fear (24.7) | Neutral (20.1) | 2.6 | 1.7 |  | - | - | - | - | - | - |
| **9,004** | GoPro Awards: Speedflying Through Fog with Jamie Lee |  | 0.9 | Fear (32.7) | Happiness (25.0) | Neutral (17.3) | 3.4 | 1.7 |  | - | - | - | - | - | - |
| **9,005** | GoPro Awards: Wingsuit Flight Between Skyscrapers with Brandon Mikesell |  | 1.7 | Happiness (27.3) | Fear (26.8) | Surprise (17.1) | 2.6 | 0 |  | - | - | - | - | - | - |
| **9,006** | GoPro: 2500m Chamonix Wingsuit Flight |  | 3.4 | Fear (30.3) | Happiness (23.6) | Neutral (20.0) | 4.3 | 0 |  | - | - | - | - | - | - |
| **9,007** | Skydive Dubai - May 2011 |  | 4.3 | Happiness (39.1) | Fear (25.4) | Surprise (11.2) | 0.9 | 1.7 |  | - | - | - | - | - | - |
| **9,008** | Extreme sports, source  YouTube |  | 1.7 | Fear (30.4) | Happiness (21.7) | Neutral (15.5) | 4.3 | 7.7 |  | - | - | - | - | - | - |
| **9,009** | GoPro: Endless Barrels - GoPro of the Winter 2013-14 powered by Surfline |  | 3.4 | Happiness (44.3) | Surprise (15.2) | Fear (11.9) | 0.9 | 9.4 |  | - | - | - | - | - | - |
| Social Inclusion | **10,000** | Qu'est-ce qu'on a (encore) fait au bon Dieu? (*n* = 228) |  | 11.1 | Happiness (43.4) | Love (37.3) | Longing  (4.8) | 2.6 | 10.3 |  | 13.5 | Happiness  (43.1) | Love  (32.4) | Neutral  (6.9) | 2.7 | 13.5 |
| **10,001** | Café de Flore |  | 1.7 | Happiness (40.2) | Love (35.2) | Compassion  (12.1) | 2.6 | 7.7 |  | 3.6 | Happiness  (33.9) | Love  (26.9) | Compassion  (19.4) | 0.9 | 9.9 |
| **10,002** | Music Within |  | 2.6 | Happiness (38.6) | Compassion  (20.1) | Solidarity (13.3) | 1.7 | 3.4 |  | 6.3 | Happiness  (32.5) | Compassion  (23.5) | Solidarity  (15.0) | 2.7 | 5.4 |
| **10,003** | Soul Surfer |  | 48.7 | Happiness (46.7) | Surprise (13.5) | Compassion  (11.8) | 1.7 | 2.6 |  | 45.0 | Happiness  (37.8) | Compassion  (19.3) | Surprise  (9.4) | 2.7 | 9.0 |
| **10,004** | The Brooke Ellison Story (*n* = 221) |  | 3.4 | Happiness (32.3) | Love (29.1) | Compassion  (12.7) | 0.9 | 11.1 |  | 1.9 | Happiness  (29.3) | Love  (28.9) | Compassion  (20.4) | 2.9 | 7.7 |
| **10,005** | Os colegas |  | 0.9 | Happiness (39.1) | Love (26.1) | Neutral  (12.2) | 3.4 | 15.4 |  | 0 | Happiness  (37.7) | Love  (22.4) | Compassion  (17.0) | 4.8 | 27.9 |
| **10,006** | Miracle in 34th street |  | 7.7 | Happiness (38.8) | Love (24.7) | Compassion  (11.0) | 1.7 | 11.1 |  | 4.8 | Happiness  (37.2) | Love  (23.5) | Neutral  (8.7) | 1.0 | 17.3 |
| **10,007** | This is us |  | 6.0 | Love (27.4) | Happiness (23.5) | Neutral  (20.0) | 2.6 | 36.8 |  | 8.7 | Love  (34.7) | Happiness  (29.1) | Longing  (9.7) | 1.9 | 51.9 |
| **10,008** | Praying with Lior |  | 0 | Happiness (44.2) | Love (18.6) | Compassion  (15.5) | 2.6 | 6.0 |  | 0 | Happiness  (44.8) | Love  (16.0) | Compassion  (9.8) | 1.0 | 21.2 |
| **10,009** | Titans  (*n* = 228) |  | 6.8 | Happiness (40.7) | Neutral  (31.4) | Surprise (8.7) | 1.7 | 13.7 |  | 8.1 | Happiness  (41.6) | Neutral  (22.0) | Longing  (10.4) | 2.7 | 25.2 |
