# Supplementary material for: The Emotional Movie Database (EMDB): An Expanded Toolkit for Emotion Research
Source: Research Square preprint supplement (doi:10.21203/rs.3.rs-6401734/v1), 2025-06-09
Supplement: Supplementary file 2 [file 59dadf9a0b35309dca8fca01.docx]

Tables

**Table 1.**

*Sociodemographic Characteristics of Participants*

| Characteristics | Lab-based assessment | | Web-based assessment | |
| --- | --- | --- | --- | --- |
| *n* | *%* | *n* | *%* |
| Sex |  |  |  |  |
| Female | 93 | 79.5 | 95 | 74.2 |
| Male | 24 | 20.5 | 33 | 25.8 |
| Nationality |  |  |  |  |
| Portuguese | - | - | 108 | 84.4 |
| Others (e.g., Brazilian) | - | - | 20 | 15.6 |
| Marital status |  |  |  |  |
| Single | - | - | 118 | 93.7 |
| Cohabiting | - | - | 3 | 2.3 |
| Married | - | - | 6 | 4.8 |
| Divorced | - | - | 1 | 0.8 |
| Education |  |  |  |  |
| Middle School | - | - | 1 | 0.8 |
| High School | - | - | 93 | 72.7 |
| Higher Education | - | - | 34 | 26.6 |
| Occupation | - | - | 102 | 79.7 |
| Student |  |  |  |  |
| Worker student | - | - | 7 | 5.5 |
| Employed | - | - | 19 | 14.8 |
| PANAS (before EMDB task) |  |  |  |  |
| Positive (*M* ± *SD*) | - | | 26.27 ± 8.03 | |
| Negative (*M* ± *SD*) | - | | 13.92 ± 5.73 | |
| PANAS (after EMDB task) |  |  |  |  |
| Positive (*M* ± *SD*) | - | | 22.50 ± 8.16 | |
| Negative (*M* ± *SD*) | - | | 15.56 ± 6.89 | |

*Note*. *N* = 245 (*n* = 117 for Lab-based assessment; *n* = 128 for Web-based assessment). Lab-based assessment participants were on average 21.10 years old (*SD* = 4.40); and Web-based assessment participants were on average 22.86 years old (*SD* = 7.50).

**Table 2.** Descriptive Statistics for Each Film Clip by Emotional Category and Experimental Condition

| Film clip Category | | Name | Clip description | Valence mean (*SD*) | | | | | Arousal mean (*SD*) | | | | | Dominance mean (*SD*) | | | | |
| --- | --- | --- | --- | --- | --- | --- | --- | --- | --- | --- | --- | --- | --- | --- | --- | --- | --- | --- |
| Overall | Lab-based validation | | Web-based validation | | Overall | Lab-based  validation | | Web-based validation | | Overall | Lab-based  validation | | Web-based validation | |
| Men | Women | Men | Women | Men | Women | Men | Women | Men | Women | Men | Women |
| Neutral | 6,002 | Big triangles  (*n* = 104) | Moving big, coloured paper triangles | 5.14  (.76) | - | - | 5.19 (.85) | 5.13  (.73) | 1.85  (1.52) | - | - | 1.65 (1.36) | 1.91 (1.57) | 7.65  (2.26) | - | - | 8.08 (1.67) | 7.51 (2.42) |
| 6,003 | Highlighters | Moving highlighters of different colours | 4.89  (1.10) | - | - | 4.73 (1.22) | 4.95 (1.06) | 2.39  (2.05) | - | - | 2.15 (2.01) | 2.47 (2.06) | 7.09  (2.43) | - | - | 7.58 (2.40) | 6.92 (2.43) |
| 6,004 | Squares | Moving coloured paper squares | 4.90  (.94) | - | - | 4.73 (.92) | 4.96 (.95) | 2.01  (1.83) | - | - | 1.69 (1.57) | 2.12 (1.91) | 7.38  (2.57) | - | - | 8.27 (1.76) | 7.08 (2.73) |
| 6,005 | Cups | Moving coloured cups | 5.11  (1.00) | - | - | 4.88 (.99) | 5.18 (1.00) | 2.15  (1.85) | - | - | 1.96 (1.80) | 2.22 (1.88) | 7.32  (2.40) | - | - | 8.00 (1.92) | 7.09 (2.51) |
| 6,006 | Painting | Painting a leaf | 5.33  (1.33) | - | - | 5.23 (1.03) | 5.36 (1.41) | 2.66  (1.93) | - | - | 2.65 (2.15) | 2.67 (1.87) | 7.05  (2.28) | - | - | 7.62 (2.10) | 6.86 (2.32) |
| 6,007 | Labyrinths | Solving three different mazes | 5.73  (1.14) | - | - | 5.35 (.69) | 5.86 (1.24) | 2.71  (2.06) | - | - | 1.96 (1.76) | 2.96 (2.10) | 7.10  (2.27) | - | - | 7.50 (2.18) | 6.96 (2.29) |
| 6,008 | Bouncing ball  (*n* = 111) | Bouncing ball slowly moving in the hall | 5.18  (1.33) | - | - | 5.45 (.91) | 5.09 (1.44) | 2.61  (2.04) | - | - | 2.59 (1.96) | 2.62 (2.08) | 6.81  (2.59) | - | - | 7.52 (2.03) | 6.56 (2.73) |
| 6,009 | Small triangles | Moving small, coloured paper triangles | 5.19  (.95) | - | - | 5.17 (.81) | 5.20 (1.00) | 2.14  (1.88) | - | - | 1.93 (1.73) | 2.22 (1.93) | 7.21  (2.56) | - | - | 8.07 (1.89) | 6.90 (2.71) |
| 6,010 | Wood doll | Handling a small wooden puppet | 4.98  (.73) | - | - | 4.97 (.50) | 4.99 (.79) | 2.13  (1.68) | - | - | 2.00 (1.69) | 2.17 (1.68) | 7.34  (2.44) | - | - | 7.45 (2.32) | 7.30 (2.49) |
| 6,011 | Gait | Gait in different shoes/sleepers | 5.06  (.91) | - | - | 5.07 (.70) | 5.06 (.97) | 2.19  (1.74) | - | - | 2.21 (1.90) | 2.18 (1.69) | 7.19  (2.57) | - | - | 7.79 (2.18) | 6.98 (2.67) |
| 6,012 | Cutlery | Putting cutlery in a tray | 5.03  (.97) | - | - | 4.83 (.76) | 5.10 (1.03) | 2.50  (1.84) | - | - | 2.21 (1.66) | 2.61 (1.90) | 6.94  (2.54) | - | - | 7.21 (2.50) | 6.84 (2.57) |
| 6,013 | Trapezoids | Moving coloured paper trapezoids | 5.11  (.62) | - | - | 5.10 (.56) | 5.11 (.65) | 1.96  (1.60) | - | - | 1.72 (1.36) | 2.05 (1.68) | 7.52  (2.26) | - | - | 8.14 (1.66) | 7.30 (2.40) |
| 6,014 | Napkins | Moving triangular, square, and rectangular napkins | 4.91  (.94) | - | - | 5.10 (.56) | 4.84 (1.04) | 2.23  (1.99) | - | - | 2.00 (1.90) | 2.32 (2.32) | 7.06  (2.67) | - | - | 7.66 (2.22) | 6.85 (2.79) |
| Social Exclusion | 7,000 | American yearbook  (*n* = 228) | Teenage boy abused by a group of young people on the street | 1.97  (1.36) | 2.46 (1.10) | 1.78 (1.13) | 2.41 (1.50) | 1.89 (1.55) | 6.21  (2.27) | 5.37 (2.28) | 6.43 (2.19) | 5.21 (2.61) | 6.57 (2.09) | 4.37  (2.58) | 4.79 (2.36) | 4.32 (2.49) | 5.34 (2.68) | 3.95 (2.64) |
| 7,001 | Bang Bang You're dead | Teenage boy attacked by a group of young people in the toilet at the school | 1.85  (1.40) | 2.42 (1.21) | 1.83 (1.40) | 2.10 (1.63) | 1.62 (1.33) | 6.61  (2.20) | 5.83 (2.53) | 6.65 (2.24) | 6.28 (2.45) | 6.93 (1.92) | 4.11  (2.54) | 4.88 (2.59) | 4.30 (2.58) | 4.34 (2.61) | 3.57 (2.39) |
| 7,002 | Kidulthood | Teenage girl beaten up in the classroom by other classmates | 2.17  (1.53) | 2.38 (1.35) | 2.13 (1.26) | 2.59 (1.99) | 2.00 (1.65) | 5.99  (2.29) | 5.58 (2.67) | 6.03 (2.32) | 5.66 (2.54) | 6.18 (2.06) | 4.62  (2.46) | 5.17 (2.79) | 4.72 (2.34) | 5.21 (2.47) | 4.15 (2.44) |
| 7,003 | Klass | Teenage boy humiliated in locker room | 2.05  (1.38) | 2.75 (1.33) | 2.02 (1.29) | 2.38 (1.37) | 1.76 (1.41) | 6.02  (2.36) | 5.46 (2.65) | 5.95 (2.39) | 5.48 (2.61) | 6.45 (2.10) | 4.46  (2.44) | 5.08 (2.57) | 4.58 (2.33) | 4.79 (2.69) | 4.02 (2.40) |
| 7,004 | Little boy | Little boy attacked by a group of older children and dragged into the dustbin on the street | 2.28  (1.47) | 2.50 (1.22) | 2.24 (1.44) | 2.34 (1.37) | 2.23 (1.61) | 5.68  (2.40) | 5.29 (2.49) | 5.91 (2.32) | 4.90 (2.50) | 5.78 (2.37) | 4.77  (2.51) | 5.21 (2.52) | 4.39 (2.34) | 5.59 (2.64) | 4.83 (2.60) |
| 7,005 | Social exclusion, source YouTube (*n* = 221) | Schoolmates bully a little boy | 2.36  (1.52) | 2.42 (1.35) | 2.20 (1.47) | 2.69 (1.76) | 2.42 (1.55) | 5.77  (2.36) | 5.42 (2.84) | 5.90 (2.25) | 4.85 (2.81) | 6.04 (2.12) | 4.72  (2.52) | 5.54 (2.72) | 4.46 (2.26) | 5.54 (3.05) | 4.50 (2.50) |
| 7,006 | Bullying the guest | Teenage boy assaulted in the school hallway by a group of students | 2.46  (1.38) | 2.75 (1.19) | 2.33 (1.32) | 2.69 (1.54) | 2.44 (1.45) | 5.56  (2.25) | 5.17 (2.55) | 5.63 (2.14) | 4.73 (2.82) | 5.86 (2.02) | 4.76  (2.43) | 5.25 (2.63) | 4.39 (2.22) | 6.15 (2.65) | 4.60 (2.41) |
| 7,007 | Girl Fight (2011) | Young woman filmed while being assaulted in a house | 2.14  (1.53) | 2.63 (1.38) | 1.90 (1.21) | 2.54 (1.63) | 2.13 (1.81) | 6.13  (2.21) | 5.50 (2.55) | 6.29 (2.26) | 5.08 (2.47) | 6.47 (1.80) | 4.67  (2.54) | 5.33 (2.67) | 4.63 (2.51) | 5.54 (2.66) | 4.21 (2.40) |
| 7,008 | Tormented | Teenage boy attacked in the sports court | 2.38  (1.58) | 2.96 (1.30) | 2.22 (1.50) | 2.65 (1.55) | 2.32 (1.72) | 5.70  (2.42) | 5.21 (2.40) | 5.83 (2.22) | 4.27 (2.74) | 6.18 (2.38) | 4.76  (2.56) | 5.04 (2.87) | 4.45 (2.32) | 6.23 (2.70) | 4.55 (2.58) |
| 7,009 | Movie Unknown | Homeless humiliated on the street | 1.92  (1.23) | 2.17 (1.24) | 1.96 (1.31) | 2.27 (1.73) | 1.68 (.83) | 6.40  (2.21) | 6.29 (2.24) | 6.31 (2.33) | 5.73 (2.44) | 6.77 (1.93) | 4.40  (2.51) | 5.08 (2.70) | 4.44 (2.47) | 5.42 (2.52) | 3.81 (2.37) |
| Unpleasant Landscapes | 8,000 | Baraka (1992) 2160p 4k | Houses and residents of a favela living in inadequate conditions 1 | 2.55  (1.45) | 2.83 (1.27) | 2.47 (1.49) | - | - | 4.81  (2.37) | 4.46 (2.73) | 4.90 (2.28) | - | - | 4.38  (2.55) | 5.17 (2.85) | 4.17 (2.43) | - | - |
| 8,001 | Baraka (1992) 2160p 4k | Children and adults searching for objects in the trash | 2.83  (1.37) | 3.00 (1.38) | 2.78 (1.37) | - | - | 4.38  (2.41) | 4.04 (2.63) | 4.47 (2.36) | - | - | 4.48  (2.59) | 5.33 (2.82) | 4.26 (2.49) | - | - |
| 8,002 | HUMAN Extended version VOL.1 | People searching for objects in the trash | 2.74  (1.35) | 3.29 (1.33) | 2.60 (1.33) | - | - | 4.42  (2.23) | 3.63 (2.37) | 4.62 (2.16) | - | - | 4.65  (2.62) | 5.50 (2.90) | 4.43 (2.51) | - | - |
| 8,003 | How plastic destroying the environment and human health - Sky News | Plastic pollution on the beach | 2.52  (1.32) | 2.92 (1.21) | 2.42 (1.34) | - | - | 4.85  (2.4) | 3.88 (2.27) | 5.10 (2.38) | - | - | 4.43  (2.64) | 5.50 (3.00) | 4.15 (2.48) | - | - |
| 8,004 | How plastic destroying the environment and human health - Sky News | People cleaning up pollution on the beach | 3.07  (1.31) | 3.21 (1.41) | 3.03 (1.29) | - | - | 4.03  (2.04) | 3.79 (2.23) | 4.10 (2.00) | - | - | 4.55  (2.46) | 5.63 (2.78) | 4.27 (2.30) | - | - |
| 8,005 | HUMAN Extended version VOL.1 | Pollution on the beach and near the favela | 2.89  (1.37) | 3.17 (1.17) | 2.82 (1.41) | - | - | 4.48  (2.28) | 3.79 (2.25) | 4.66 (2.26) | - | - | 4.59  (2.44) | 5.25 (2.63) | 4.42 (2.37) | - | - |
| 8,006 | Baraka (1992) 2160p 4k | Homeless adults and children on the street | 2.09  (1.33) | 2.63 (1.28) | 1.96 (1.31) | - | - | 5.22  (2.43) | 4.50 (2.70) | 5.41 (2.33) | - | - | 4.43  (2.62) | 5.50 (3.05) | 4.15 (2.44) | - | - |
| 8,007 | Samsara (2011) | Street vendors with poor conditions; and children and adults looking for valuables in the trash | 2.70  (1.33) | 2.96 (1.30) | 2.63 (1.34) | - | - | 4.69  (2.41) | 4.00 (2.55) | 4.87 (2.36) | - | - | 4.38  (2.52) | 5.17 (2.99) | 4.18 (2.36) | - | - |
| 8,008 | Samsara (2011) | Houses and residents of a favela with inadequate conditions 2 | 2.79  (1.3) | 3.08 (1.18) | 2.72 (1.32) | - | - | 4.40  (2.22) | 3.88 (2.68) | 4.54 (2.08) | - | - | 4.36  (2.53) | 5.21 (3.13) | 4.14 (2.33) | - | - |
| 8,009 | Baraka (1992) 2160p 4k | Houses of a favela with inadequate conditions | 3.46  (1.23) | 3.58 (1.10) | 3.43 (1.26) | - | - | 4.04  (2.18) | 3.75 (2.31) | 4.12 (2.16) | - | - | 4.60 (2.49) | 5.08 (2.92) | 4.47 (2.37) | - | - |
| Extreme Sports | 9,000 | Dan Atherton Sends It Down the Hardline MTB Track | Downhill with Dan Atherton | 5.85  (1.48) | 6.08 (1.61) | 5.80 (1.45) | - | - | 5.32  (2.38) | 5.25 (2.58) | 5.33 (2.34) | - | - | 4.98  (2.58) | 5.13 (2.88) | 4.95 (2.51) | - | - |
| 9,001 | GoPro: Carson Storch's GIANT 360 Drop at Red Bull Rampage 2016 | Downhill with Carson Storch | 5.80  (1.63) | 5.96 (1.78) | 5.76 (1.59) | - | - | 5.76  (2.31) | 5.33 (2.81) | 5.87 (2.17) | - | - | 5.09  (2.3) | 5.13 (2.71) | 5.09 (2.20) | - | - |
| 9,002 | Kenny Belaey's Balance | Kenny Belaey Rides Bike Across Slackline | 6.02  (1.82) | 6.29 (1.90) | 5.95 (1.80) | - | - | 6.35  (2.29) | 5.83 (2.84) | 6.48 (2.13) | - | - | 4.98  (2.43) | 4.50 (2.84) | 5.11 (2.31) | - | - |
| 9,003 | GoPro Awards: Base Jump | Parachute jump from the cliff | 6.37  (1.47) | 6.29 (1.43) | 6.39 (1.48) | - | - | 4.89  (2.4) | 4.50 (2.96) | 4.99 (2.24) | - | - | 5.39  (2.69) | 5.08 (3.28) | 5.47 (2.54) | - | - |
| 9,004 | GoPro Awards: Speedflying Through Fog with Jamie Lee | Speedflying along the cliff | 6.09  (1.39) | 6.50 (1.35) | 5.99 (1.39) | - | - | 5.12  (2.42) | 5.67 (2.70) | 4.98 (2.33) | - | - | 5.09  (2.45) | 4.88 (2.85) | 5.15 (2.35) | - | - |
| 9,005 | GoPro Awards: Wingsuit Flight Between Skyscrapers with Brandon Mikesell | Wingsuit 1 | 6.51  (1.51) | 6.42 (1.64) | 6.54 (1.48) | - | - | 5.28  (2.55) | 4.92 (3.13) | 5.38 (2.39) | - | - | 5.27  (2.56) | 5.54 (2.99) | 5.20 (2.44) | - | - |
| 9,006 | GoPro: 2500m Chamonix Wingsuit Flight | Wingsuit 2 | 5.94  (1.35) | 6.08 (1.53) | 5.90 (1.30) | - | - | 4.71  (2.36) | 5.08 (2.84) | 4.61 (2.23) | - | - | 4.96  (2.58) | 5.17 (2.97) | 4.90 (2.48) | - | - |
| 9,007 | Skydive Dubai - May 2011 | Dubay sky jumping | 6.59  (1.45) | 6.25 (1.51) | 6.68 (1.43) | - | - | 5.45  (2.46) | 4.88 (2.92) | 5.60 (2.31) | - | - | 5.09  (2.53) | 5.58 (3.13) | 4.97 (2.35) | - | - |
| 9,008 | Extreme sports, source  YouTube | Skying | 6.09  (1.42) | 6.50 (1.56) | 5.99 (1.37) | - | - | 5.12  (2.35) | 5.04 (2.73) | 5.14 (2.25) | - | - | 5.20  (2.56) | 4.67 (3.13) | 5.33 (2.40) | - | - |
| 9,009 | GoPro: Endless Barrels - GoPro of the Winter 2013-14 powered by Surfline | Surfing | 7.19  (1.52) | 7.17 (1.44) | 7.19 (1.55) | - | - | 5.40  (2.37) | 5.04 (2.63) | 5.49 (2.31) | - | - | 5.37  (2.63) | 5.25 (3.00) | 5.40 (2.54) | - | - |
| Social Inclusion | 10,000 | Qu'est-ce qu'on a (encore) fait au bon Dieu? (*n* = 228) | Laure Verneuil-Koffi is accompanied down the aisle by her father and father-in-law | 7.50 (1.64) | 7.21 (1.50) | 7.88 (1.07) | 6.38 (1.90) | 7.54 (1.93) | 5.10 (2.18) | 4.42 (2.48) | 5.45 (1.86) | 4.03 (2.43) | 5.27 (2.21) | 5.61  (2.47) | 5.38 (3.05) | 5.55 (2.38) | 6.38 (2.60) | 5.49 (2.34) |
| 10,001 | Café de Flore | Moment of complicity between mother and child | 7.72 (1.30) | 7.42 (1.47) | 7.83 (1.09) | 7.31 (1.56) | 7.83 (1.35) | 5.08 (2.45) | 5.00 (2.67) | 5.53 (2.24) | 4.34 (2.86) | 4.87 (2.40) | 5.53  (2.49) | 5.21 (2.99) | 5.51 (2.34) | 6.48 (2.47) | 5.32 (2.45) |
| 10,002 | Music Within | Two friends skating, one in a wheelchair | 7.07 (1.47) | 6.71 (1.37) | 7.14 (1.41) | 6.83 (1.67) | 7.20 (1.49) | 4.74 (2.19) | 4.38 (2.52) | 4.81 (1.96) | 4.10 (2.37) | 5.00 (2.27) | 5.54  (2.38) | 5.67 (2.63) | 5.26 (2.31) | 6.10 (2.61) | 5.61 (2.23) |
| 10,003 | Soul Surfer | Bethany Hamilton surfs for the first time after losing an arm | 7.36  (1.53) | 7.00 (1.29) | 7.56 (1.22) | 7.10 (1.57) | 7.34 (1.85) | 5.27  (2.38) | 4.71 (2.73) | 5.37 (2.09) | 4.62 (2.74) | 5.56 (2.41) | 5.40  (2.55) | 5.25 (2.86) | 5.18 (2.38) | 5.96 (2.97) | 5.49 (2.49) |
| 10,004 | The Brooke Ellison Story (*n* = 221) | A woman in a wheelchair dancing with the man she loves | 7.05  (1.43) | 6.92 (1.25) | 7.14 (1.35) | 6.38 (1.58) | 7.19 (1.50) | 4.48  (2.38) | 4.29 (2.27) | 7.14 (1.35) | 3.54 (2.67) | 4.38 (2.34) | 5.57  (2.47) | 5.38 (2.52) | 5.15 (2.48) | 6.73 (2.69) | 5.76 (2.26) |
| 10,005 | Os colegas | A woman dancing with her friends in her wedding party | 6.87  (1.48) | 6.58 (1.61) | 7.06 (1.22) | 5.73 (1.78) | 7.10 (1.45) | 4.27  (2.27) | 3.96 (2.65) | 4.63 (2.11) | 3.46 (2.45) | 4.21 (2.22) | 5.83  (2.45) | 5.04 (3.07) | 5.23 (2.36) | 6.92 (1.85) | 6.44 (2.27) |
| 10,006 | Miracle in 34th street | Little girl meets Santa Claus | 7.62 (1.42) | 7.29 (1.43) | 7.73 (1.43) | 7.08 (1.47) | 7.76 (1.36) | 4.59 (2.43) | 4.50 (2.78) | 5.02 (2.17) | 3.35 (2.50) | 4.51 (2.48) | 5.81  (2.49) | 5.46 (2.86) | 5.58 (2.34) | 6.54 (2.52) | 5.96 (2.53) |
| 10,007 | This is us | While the rest of the family is asleep, a mother and a child are confiding | 6.64  (1.57) | 6.08 (1.28) | 6.35 (1.61) | 6.38 (1.44) | 7.23 (1.50) | 3.54  (2.22) | 3.38 (2.41) | 3.65 (2.09) | 3.08 (2.47) | 3.62 (2.25) | 5.73  (2.7) | 5.58 (2.96) | 5.19 (2.84) | 6.81 (2.48) | 6.06 (2.38) |
| 10,008 | Praying with Lior | Lior is very happy at his bar mitzvah | 7.16 (1.46) | 6.75 (1.33) | 7.41 (1.24) | 6.65 (1.38) | 7.15 (1.71) | 4.41 (2.30) | 4.17 (2.82) | 4.55 (2.09) | 4.00 (2.50) | 4.46 (2.32) | 5.65  (2.53) | 5.42 (3.19) | 5.18 (2.32) | 6.73 (2.54) | 5.92 (2.44) |
| 10,009 | Titans  (*n* = 228) | A group of young men of an American football team celebrate | 6.56  (1.33) | 6.42 (1.41) | 6.47 (1.29) | 6.28 (1.22) | 6.79 (1.36) | 4.20  (2.22) | 3.88 (2.03) | 3.65 (2.16) | 4.31 (2.25) | 4.54 (2.31) | 5.64  (2.55) | 5.54 (2.90) | 5.16 (2.76) | 6.90 (1.93) | 5.77 (2.26) |

**Table 3.** Comparison of Self-Assessment Ratings Between Lab-Based and Web-Based Assessments for Social Exclusion and Social Inclusion Clips

| Film clip Category | | Name | Lab-based assessment group | | |  | Web-based assessment group | | |  | Valence | | | | Arousal | | | | Dominance | | | |
| --- | --- | --- | --- | --- | --- | --- | --- | --- | --- | --- | --- | --- | --- | --- | --- | --- | --- | --- | --- | --- | --- | --- |
| Valence  *M* (*SD*) | Arousal  *M* (*SD*) | Dominance  *M*  (*SD*) |  | Valence  *M* (*SD*) | Arousal  *M* (*SD*) | Dominance  *M*  (*SD*) |  | *df* | *t* | *p* | Cohen’s *d* | *df* | *t* | *p* | Cohen’s *d* | *df* | *t* | *p* | Cohen’s *d* |
| Social Exclusion | 7,000 | American yearbook  (*n* = 228) | 1.92 (1.15) | 6.21 (2.24) | 4.42  (2.46) |  | 2.03 (1.55) | 6.22 (2.30) | 4.32  (2.71) |  | 23 | .58 | *p*>.05 | .08 | 23 | .01 | *p*>.05 | .004 | 23 | -.30 | *p*>.05 | .04 |
| 7,001 | Bang Bang You're dead | 1.95 (1.38) | 6.48 (2.31) | 4.42  (2.58) |  | 1.75 (1.42) | 6.76 (2.08) | 3.77  (2.46) |  | 23 | 1.08 | *p*>.05 | .14 | 23 | -.95 | *p*>.05 | .19 | 23 | 1.92 | *p*>.05 | .26 |
| 7,002 | Kidulthood | 2.18 (1.28) | 5.94 (2.39) | 4.81  (2.43) |  | 2.15 (1.75) | 6.05 (2.19) | 4.42  (2.48) |  | 23 | .13 | *p*>.05 | .02 | 23 | -.35 | *p*>.05 | .05 | 23 | 1.20 | *p*>.05 | .16 |
| 7,003 | Klass | 2.17 (1.33) | 5.85 (2.44) | 4.68  (2.38) |  | 1.92 (1.42) | 6.22 (2.27) | 4.23  (2.49) |  | 23 | 1.38 | *p*>.05 | .18 | 23 | -1.13 | *p*>.05 | .15 | 23 | 1.42 | *p*>.05 | .18 |
| 7,004 | Little boy | 2.29 (1.40) | 5.79 (2.36) | 4.56  (2.39) |  | 2.26 (1.54) | 5.55 (2.43) | 5.03  (2.62) |  | 23 | .15 | *p*>.05 | .16 | 23 | .75 | *p*>.05 | .10 | 23 | -1.42 | *p*>.05 | .19 |
| 7,005 | Social exclusion, source YouTube (*n* = 221) | 2.25 (1.44) | 5.80 (2.38) | 4.68  (2.39) |  | 2.49 (1.60) | 5.74 (2.36) | 4.76  (2.67) |  | 22 | -1.18 | *p*>.05 | .02 | 22 | .20 | *p*>.05 | .03 | 22 | -.22 | *p*>.05 | .03 |
| 7,006 | Bullying the guest | 2.42 (1.30) | 5.54 (2.22) | 4.56  (2.32) |  | 2.50 (1.47) | 5.58 (2.29) | 4.99  (2.55) |  | 22 | -.44 | *p*>.05 | .06 | 22 | -.13 | *p*>.05 | .02 | 22 | -1.30 | *p*>.05 | .18 |
| 7,007 | Girl Fight (2011) | 2.05 (1.27) | 6.13 (2.34) | 4.78  (2.55) |  | 2.23 (1.77) | 6.13 (2.07) | 4.54  (2.52) |  | 22 | -.87 | *p*>.05 | .12 | 22 | .01 | *p*>.05 | 0 | 22 | .70 | *p*>.05 | .09 |
| 7,008 | Tormented | 2.37 (1.48) | 5.70 (2.26) | 4.57  (2.44) |  | 2.40 (1.68) | 5.70 (2.60) | 4.97  (2.70) |  | 22 | -.17 | *p*>.05 | .02 | 22 | -.00 | *p*>.05 | 0 | 22 | -1.15 | *p*>.05 | .16 |
| 7,009 | Movie Unknown | 2.00 (1.29) | 6.31 (2.30) | 4.57  (2.52) |  | 1.83 (1.14) | 6.51 (2.11) | 4.21  (2.50) |  | 22 | 1.05 | *p*>.05 | .14 | 22 | -.68 | *p*>.05 | .09 | 22 | 1.07 | *p*>.05 | .14 |
|  |  | Total | 2.16 (1.07) | 5.97 (2.07) | 4.61  (2.09) |  | 2.11 (1.13) | 6.11 (1.89) | 4.56  (2.08) |  | 24 | .37 | *p*>.05 | .05 | 24 | -.55 | *p*>.05 | .07 | 24 | .18 | *p*>.05 | .02 |
| Social Inclusion | 10,000 | Qu'est-ce qu'on a (encore) fait au bon Dieu? (*n* = 228) | 7.74 (1.20) | 5.24 (2.04) | 5.51  (2.51) |  | 7.23 (1.98) | 4.95 (2.32) | 5.72  (2.43) |  | 179.04 | 2.33 | *p<*.05 | .05 | 23 | 1.01 | *p*>.05 | .13 | 23 | -.64 | *p*>.05 | .09 |
| 10,001 | Café de Flore | 7.74 (1.18) | 5.42 (2.33) | 5.44  (2.48) |  | 7.69 (1.42) | 4.73 (2.53) | 5.62  (2.50) |  | 23 | .29 | *p*>.05 | .04 | 23 | 2.14 | *p*<.05 | .28 | 23 | -.54 | *p*>.05 | .07 |
| 10,002 | Music Within | 7.05 (1.41) | 4.72 (2.08) | 5.34  (2.38) |  | 7.10 (1.54) | 4.77 (2.32) | 5.74  (2.37) |  | 23 | -.25 | *p*>.05 | .03 | 23 | -.16 | *p*>.05 | .02 | 23 | -1.26 | *p*>.05 | .17 |
| 10,003 | Soul Surfer | 7.44 (1.25) | 5.23 (2.24) | 5.20  (2.48) |  | 7.28  (1.77) | 5.32 (2.52) | 5.61  (2.62) |  | 196.52 | .81 | *p*>.05 | .10 | 23 | -.27 | *p*>.05 | .04 | 23 | -1.23 | *p*>.05 | .16 |
| 10,004 | The Brooke Ellison Story (*n* = 221) | 7.09 (1.33) | 4.76 (2.30) | 5.20  (2.48) |  | 6.99 (1.55) | 4.17 (2.44) | 6.00  (2.40) |  | 22 | .54 | *p*>.05 | .07 | 22 | 1.84 | *p*>.05 | .25 | 22 | -2.44 | *p<*.05 | .33 |
| 10,005 | Os colegas | 6.97 (1.32) | 4.50 (2.23) | 5.19  (2.51) |  | 6.76 (1.64) | 4.02 (2.29) | 6.56  (2.17) |  | 22 | 1.04 | *p*>.05 | .14 | 22 | 1.57 | *p*>.05 | .21 | 22 | -4.32 | *p*<.001 | .58 |
| 10,006 | Miracle in 34th street | 7.64 (1.44) | 4.91 (2.31) | 5.56  (2.44) |  | 7.59 (1.41) | 4.22 (2.52) | 6.11  (2.52) |  | 22 | .28 | *p*>.05 | .04 | 22 | 2.13 | *p*<.05 | .29 | 22 | -1.65 | *p*>.05 | .22 |
| 10,007 | This is us | 6.30 (1.54) | 3.59 (2.15) | 5.27  (2.86) |  | 7.02 (1.53) | 3.48 (2.31) | 6.25  (2.42) |  | 22 | -3.48 | *p*<.01 | .50 | 22 | .36 | *p*>.05 | .05 | 22 | -2.73 | *p<*.01 | .37 |
| 10,008 | Praying with Lior | 7.27 (1.28) | 4.47 (2.25) | 5.23  (2.51) |  | 7.03 (1.64) | 4.35 (2.36) | 6.13  (2.48) |  | 22 | 1.24 | *p*>.05 | .16 | 22 | .40 | *p*>.05 | .05 | 22 | -2.66 | *p<*.01 | .36 |
| 10,009 | Titans (*n* = 228) | 6.46 (1.31) | 3.93 (2.13) | 5.24  (2.78) |  | 6.66 (1.34) | 4.48 (2.28) | 6.06  (2.23) |  | 23 | -1.12 | *p*>.05 | .15 | 23 | -1.87 | *p*>.05 | .25 | 220.01 | -2.48 | *p<*.05 | .33 |
|  | Total | 7.17 (0.92) | 4.68 (1.72) | 5.32  (2.07) |  | 7.14 (1.13) | 4.53 (1.81) | 5.89  (1.82) |  | 239.56 | .25 | *p*>.05 | .03 | 24 | .66 | *p*>.05 | .08 | 24 | -2.32 | *p<*.05 | .29 |

**Table 4.** Descriptive Statistics for Emotional Ratings by Film Category

| Valence | *M* | *SEM* | 95% CI | | Arousal | *M* | *SEM* | 95% CI | | Dominance | *M* | *SEM* | 95% CI | |
| --- | --- | --- | --- | --- | --- | --- | --- | --- | --- | --- | --- | --- | --- | --- |
| LB | UB | LB | UB | LB | UB |
| Social Exclusion | 2.16 | .10 | 1.96 | 2.36 | Social Exclusion | 5.97 | .19 | 5.60 | 6.35 | Social Exclusion | 4.61 | .19 | 4.22 | 4.99 |
| Unpleasant Landscapes | 2.77 | .09 | 2.58 | 2.95 | Unpleasant Landscapes | 4.53 | .19 | 4.17 | 4.90 | Unpleasant Landscapes | 4.48 | .20 | 4.08 | 4.89 |
| Extreme Sports | 6.25 | .10 | 6.04 | 6.45 | Extreme Sports | 5.34 | .18 | 4.98 | 5.70 | Extreme Sports | 5.14 | .19 | 4.76 | 5.53 |
| Social Inclusion | 7.17 | .09 | 7.00 | 7.34 | Social Inclusion | 4.68 | .16 | 4.36 | 4.99 | Social Inclusion | 5.32 | .19 | 4.94 | 5.70 |

*Note*. CI, Confidence Interval; LB, Lower Bound; SEM, Standard Error of the Mean; UB, Upper Bound

**Table 5.** Descriptive Statistics for Emotional Ratings in Web-Based Assessment

| Valence | *M* | *SEM* | 95% CI | | Arousal | *M* | *SEM* | 95% CI | | Dominance | *M* | *SEM* | 95% CI | |
| --- | --- | --- | --- | --- | --- | --- | --- | --- | --- | --- | --- | --- | --- | --- |
| LB | UB | LB | UB | LB | UB |
| Neutral | 5.11 | .04 | 5.03 | 5.18 | Neutral | 2.32 | .12 | 2.08 | 2.55 | Neutral | 7.21 | .17 | 6.87 | 7.55 |
| Social Exclusion | 2.11 | .10 | 1.91 | 2.31 | Social Exclusion | 6.11 | .17 | 5.78 | 6.45 | Social Exclusion | 4.56 | .18 | 4.20 | 4.93 |
| Social Inclusion | 7.14 | .10 | 6.94 | 7.34 | Social Inclusion | 4.53 | .16 | 4.21 | 4.85 | Social Inclusion | 5.90 | .16 | 5.58 | 6.21 |

*Note*. CI, Confidence Interval; LB, Lower Bound; SEM, Standard Error of the Mean; UB, Upper Bound
